# Supplementary material for: How much K is OK? Evaluating different methods for K-concentration determination and the effect of the internal K concentration on feldspar luminescence dating
Source: Copernicus journal article supplement (doi:10.5194/gchron-7-475-2025), 2025-10-20
Supplement: Supplementary file 1 [file Revised_Table_S5_DRAC.xlsx]

## Sheet: Tabelle1
DRAC v.1.2 Inputs
Full details of the inputs required for a DRAC dose rate calculation and the calculation process can be found in the paper and the DRAC website (www.aber.ac.uk/alrl/drac).
Please cite all uses of DRAC	including the version number	as Durcan	J.A.	King	G.E.	and Duller	G.A.T.	2015. DRAC: Dose rate and age calculator for trapped charge dating. Quaternary Geochronology	28	54-61. Corresponding authors: Julie Durcan (julie.durcan@ouce.ox.ac.uk) and Georgina King (georgina.king@uni-koeln.de).
To calculate dose rates using DRAC	the data table below (excluding headers) can be copied and pasted into the calculator box on the DRAC website (www.aber.ac.uk/alrl/DRAC). Once 'calculate' has been clicked	DRAC will generate an output file	which can be saved by the user.
TI:1	TI:2	TI:3	TI:4	TI:5	TI:6	TI:7	TI:8	TI:9	TI:10	TI:11	TI:12	TI:13	TI:14	TI:15	TI:16	TI:17	TI:18	TI:19	TI:20	TI:21	TI:22	TI:23	TI:24	TI:25	TI:26	TI:27	TI:28	TI:29	TI:30	TI:31	TI:32	TI:33	TI:34	TI:35	TI:36	TI:37	TI:38	TI:39	TI:40	TI:41	TI:42	TI:43	TI:44	TI:45	TI:46	TI:47	TI:48	TI:49	TI:50
Project ID	Sample ID	Mineral	Conversion factors	ExternalU (ppm)	errExternal U (ppm)	External Th (ppm)	errExternal Th (ppm)	External K (%)	errExternal K (%)	External Rb (ppm)	errExternal Rb (ppm)	Calculate external Rb from K conc?	Internal U (ppm)	errInternal U (ppm)	Internal Th (ppm)	errInternal Th (ppm)	Internal K (%)	errInternal K (%)	Internal Rb (ppm)	errInternal Rb (ppm)	Calculate internal Rb from K conc?	User external alphadoserate (Gy.ka-1)	errUser external alphadoserate (Gy.ka-1)	User external betadoserate (Gy.ka-1)	errUser external betadoserate (Gy.ka-1)	User external gamma doserate (Gy.ka-1)	errUser external gammadoserate (Gy.ka-1)	User internal doserate (Gy.ka-1)	errUser internal doserate (Gy.ka-1)	Scale gammadoserate at shallow depths?	Grain size min (microns)	Grain size max (microns)	alpha-Grain size attenuation	beta-Grain size attenuation	Etch depth min (microns)	Etch depth max (microns)	beta-Etch depth attenuation factor	a-value	erra-value	Water content ((wet weight - dry weight)/dry weight) %	errWater content %	Depth (m)	errDepth (m)	Overburden density (g cm-3)	errOverburden density (g cm-3)	Latitude (decimal degrees)	Longitude (decimal degrees)	Altitude (m)	User cosmicdoserate (Gy.ka-1)
Example_input	ARO-18-08LP	F	Guerinetal2011	1.43	0.09	4.002	0.26	1.23	0.02	0	0	Y	X	X	X	X	individual with values from section 5.1	individual with values from section 5.1	X	X	Y	X	X	X	X	X	X	X	X	Y	200	250	Brennanetal1991	Guerinetal2012-F	0	0	Bell1979	0.11	0.05	2	1	0.45	0.03	1.8	0.1	-19.6594	-69.5976	1627	X
Example_input	CSA-1-2-2	F	Guerinetal2011	2.44	0.17	9.32	0.66	1.9	0.05	0	0	Y	X	X	X	X	individual with values from section 5.1	individual with values from section 5.1	X	X	Y	X	X	X	X	X	X	X	X	Y	100	200	Brennanetal1991	Guerinetal2012-F	0	0	Bell1979	0.11	0.05	0	0	0.035	0.005	1.8	0.1	-19.6056	-70.0978	1204	X
Example_input	LAGU-1-1	F	Guerinetal2011	2.82	0.2	7.16	0.51	1.5	0.04	0	0	Y	X	X	X	X	individual with values from section 5.1	individual with values from section 5.1	X	X	Y	X	X	X	X	X	X	X	X	Y	100	250	Brennanetal1991	Guerinetal2012-F	0	0	Bell1979	0.11	0.05	2	1	7.5	2.5	1.8	0.1	-21.0332	-69.7981	1035	X
Example_input	PAG-6-4b	F	Guerinetal2011	1.43	0.09	4.002	0.26	1.23	0.02	0	0	Y	X	X	X	X	individual with values from section 5.1	individual with values from section 5.1	X	X	Y	X	X	X	X	X	X	X	X	Y	100	200	Brennanetal1991	Guerinetal2012-F	0	0	Bell1979	0.11	0.05	3	3	3.27	0.05	1.8	0.1	-21.5421	-69.9133	940	X
Example_input	PAG-6-6b	F	Guerinetal2011	1.904	0.091	7.217	0.366	1.543	0.028	0	0	Y	X	X	X	X	individual with values from section 5.1	individual with values from section 5.1	X	X	Y	X	X	X	X	X	X	X	X	Y	100	200	Brennanetal1991	Guerinetal2012-F	0	0	Bell1979	0.11	0.05	3	3	5.08	0.05	1.8	0.1	-21.5421	-69.9133	940	X
Example_input	ABLR-1	F	Guerinetal2011	2.47	0.14	7.76	0.47	1.7	0.02	0	0	Y	X	X	X	X	individual with values from section 5.1	individual with values from section 5.1	X	X	Y	X	X	X	X	X	X	X	X	Y	100	200	Brennanetal1991	Guerinetal2012-F	0	0	Bell1979	0.11	0.05	15	5	0.02	0.02	1.8	0.1	50.0252	-104.988	586	X
Example_input	HAM-5	F	Guerinetal2011	1.4	0.3	4.9	0.3	2.02	0.16	0	0	Y	X	X	X	X	individual with values from section 5.1	individual with values from section 5.1	X	X	Y	X	X	X	X	X	X	X	X	Y	100	200	Brennanetal1991	Guerinetal2012-F	0	0	Bell1979	0.11	0.05	20.5357	10	10.42	0.06	1.8	0.1	34.7524	137.573	-1	X
Example_input	ISM-7	F	Guerinetal2011	0.89	0.06	3.32	0.21	1.02	0.01	0	0	Y	X	X	X	X	individual with values from section 5.1	individual with values from section 5.1	X	X	Y	X	X	X	X	X	X	X	X	Y	100	200	Brennanetal1991	Guerinetal2012-F	0	0	Bell1979	0.11	0.05	5	5	0.7	0.03	1.8	0.1	-37.0223	-73.5121	4	X
Example_input	KTB-383-C	F	Guerinetal2011	2.5	0.1	7.7	0.3	1.72	0.02	0	0	Y	X	X	X	X	individual with values from section 5.1	individual with values from section 5.1	X	X	Y	X	X	X	X	X	X	X	X	Y	180	250	Brennanetal1991	Guerinetal2012-F	10	15	Bell1979	0.11	0.05	2	2	1730	0.5	1.8	0.1	49.8153	12.1206	516	X
Example_input	MBT-I-2430	F	Guerinetal2011	14.6	0	23.9	0	5.4	0	0	0	Y	X	X	X	X	individual with values from section 5.1	individual with values from section 5.1	X	X	Y	X	X	X	X	X	X	X	X	Y	180	212	Brennanetal1991	Guerinetal2012-F	0	0	Bell1979	0.11	0.05	1	0	1266	100	1.8	0.1	45.8353	6.93306	2628	X
[truncated: 3 more columns]
