# Supplementary material for: How much K is OK? Evaluating different methods for K-concentration determination and the effect of the internal K concentration on feldspar luminescence dating
Source: Copernicus journal article supplement (doi:10.5194/gchron-7-475-2025), 2025-10-20
Supplement: Supplementary file [file gchron-7-475-2025-supplement-title-page.pdf › gchron-7-475-2025-supplement-title-page.pdf]

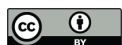

*Supplement of*

**How much K is OK? Evaluating different methods for  
K-concentration determination and the effect of the internal  
K concentration on feldspar luminescence dating**

**Linda A. E. Maßon et al.**

*Correspondence to:* Linda A. E. Maßon (l.masson@uni-koeln.de)

- gchron-7-475-2025-supplement-title-page.pdf
- Revised\_Supplement\_of\_How\_much\_K\_is\_OK.pdf
- Revised\_Table\_S5\_DRAC.xlsx
- Table\_S1\_Literature\_Review.xlsx

The copyright of individual parts of the supplement might differ from the article licence.
